# Supplementary material for: Halofuginone reduces the inflammatory responses of DSS-induced colitis through metabolic reprogramming
Source: Royal Society of Chemistry journal article supplement (doi:10.1039/c6mb00154h), 2016-05-09

Supporting information

Halofuginone reduces inflammatory responses of DSS-induced colitis through metabolic reprogramming

Jing Liu<sup>a,b</sup>, Hai-Tao Xiao<sup>b,c</sup>, Hong-Sheng Wang<sup>a</sup>, Huai-Xue Mu<sup>b</sup>, Ling Zhao<sup>b</sup>, Jun Du<sup>a</sup>, Depo Yang<sup>a</sup>, Dongmei Wang<sup>a,\*</sup>, Zhao-Xiang Bian<sup>b,\*</sup>, and Shu-Hai Lin<sup>b,d,\*</sup>

<sup>a</sup> School of Pharmaceutical Sciences, Sun Yat-Sen University, Guangzhou 510006, China

<sup>b</sup> School of Chinese Medicine, Hong Kong Baptist University, Hong Kong SAR, China.

<sup>c</sup> School of Pharmacy, Guizhou Medicinal University, Guiyang 550025, China.

<sup>d</sup> Department of Biochemistry and Molecular Cell Biology, Shanghai Key Laboratory for Tumor Microenvironment and Inflammation, Shanghai Jiao Tong University School of Medicine (SJTU-SM), Shanghai 200025, China.

To whom correspondence should be addressed to: slin@shsmu.edu.cn (S.H.L.);  
bzxiang@hkbu.edu.hk (Z.X.B.); lsswdm@mail.sysu.edu.cn (D.W.).

Table S1.

## Biomarkers identified in the liver and spleen of mice induced by DSS

| No. | R.T. | M/z      | Ion modes | Tissue | Metabolite                                  | Mass error | Method |
|-----|------|----------|-----------|--------|---------------------------------------------|------------|--------|
| 1   | 1.10 | 532.3594 | +         | Liver  | LysoPC(O-18:0)                              | 27         | Amide  |
| 2   | 1.10 | 544.3495 | +         | Liver  | LysoPC(20:4(5Z,8Z,11Z,14Z))                 | 17         | Amide  |
| 3   | 1.11 | 556.3499 | +         | Liver  | LysoPE(0:0/22:2(13Z,16Z))                   | 22         | Amide  |
| 4   | 1.12 | 768.5413 | +         | Liver  | PE(22:1(13Z)/14:0)                          | 13         | Amide  |
| 5   | 1.16 | 767.4879 | +         | Liver  | PG(18:3(6Z,9Z,12Z)/18:3(6Z,9Z,12Z))         | 2          | Amide  |
| 6   | 1.17 | 768.4911 | +         | Liver  | PS(15:0/20:5(5Z,8Z,11Z,14Z,17Z))            | 13         | Amide  |
| 7   | 1.22 | 510.3483 | +         | Liver  | LysoPC(17:0)                                | 13         | Amide  |
| 8   | 1.38 | 544.3492 | +         | Liver  | LysoPC(20:4(5Z,8Z,11Z,14Z))                 | 17         | Amide  |
| 9   | 1.81 | 756.5586 | +         | Liver  | PC(18:3(9Z,12Z,15Z)/16:0)                   | 6          | Amide  |
| 10  | 2.16 | 757.5628 | +         | Liver  | PA(18:0/22:2(13Z,16Z))                      | 15         | Amide  |
| 11  | 2.16 | 760.5882 | +         | Liver  | PC(16:0/18:1(11E))                          | 4          | Amide  |
| 12  | 2.16 | 761.5930 | +         | Liver  | PA(18:0/22:0)[U]                            | 16         | Amide  |
| 13  | 2.16 | 762.5962 | +         | Liver  | PC(14:0/20:0)                               | 5          | Amide  |
| 14  | 3.53 | 205.0994 | +         | Liver  | L-Tryptophan                                | 10         | Amide  |
| 15  | 6.14 | 133.0612 | +         | Liver  | L-Asparagine                                | 3          | Amide  |
| 16  | 7.00 | 175.1206 | +         | Liver  | L-Arginine                                  | 13         | Amide  |
| 17  | 7.70 | 156.0781 | +         | Liver  | L-Histidine                                 | 17         | Amide  |
| 18  | 1.33 | 797.5299 | -         | Liver  | PG(16:0/22:4(7Z,10Z,13Z,16Z))               | 4          | Amide  |
| 19  | 3.64 | 134.0476 | -         | Liver  | Adenine                                     | 2          | Amide  |
| 20  | 4.90 | 268.1043 | -         | Liver  | Asparaginyl-Histidine/Histidinyl-Asparagine | 3          | Amide  |
| 21  | 7.21 | 503.1626 | -         | Liver  | Maltotriose                                 | 1          | Amide  |
| 22  | 1.05 | 703.4604 | +         | Spleen | PG(18:3(9Z,12Z,15Z)/13:0)                   | 8          | Amide  |
| 23  | 1.05 | 704.4635 | +         | Spleen | PS(18:2(9Z,12Z)/12:0)                       | 19         | Amide  |
| 24  | 1.06 | 675.4285 | +         | Spleen | PG(12:0/15:0)                               | 11         | Amide  |
| 25  | 1.15 | 813.4551 | +         | Spleen | PI(13:0/18:3(6Z,9Z,12Z))                    | 3          | Amide  |
| 26  | 1.19 | 488.3040 | +         | Spleen | Glycocholic acid                            | 11         | Amide  |
| 27  | 1.20 | 500.3040 | +         | Spleen | Taurodeoxycholic acid                       | 0          | Amide  |
| 28  | 1.51 | 769.5944 | +         | Spleen | PA(P-20:0/22:2(13Z,16Z))                    | 20         | Amide  |
| 29  | 2.49 | 808.5193 | +         | Spleen | PS(20:5(5Z,8Z,11Z,14Z,17Z)/18:1(9Z))        | 8          | Amide  |
| 30  | 1.21 | 172.9902 | -         | Spleen | 4-Hydroxybenzenesulfonic acid               | 7          | Amide  |
| 31  | 1.37 | 202.1066 | -         | Spleen | Acetylcarnitine                             | 9          | Amide  |
| 32  | 2.38 | 806.4922 | -         | Spleen | PS(18:1(9Z)/20:5(5Z,8Z,11Z,14Z,17Z))        | 6          | Amide  |
| 33  | 2.41 | 782.4922 | -         | Spleen | PS(18:0/18:4(6Z,9Z,12Z,15Z))                | 7          | Amide  |
| 34  | 2.80 | 566.3417 | -         | Spleen | PS(21:0/0:0)                                | 8          | Amide  |

Table S2.

## Significant changes of metabolome in liver and spleen tissue of mice induced by DSS

| Metabolite                                 | CON        | DSS        | HF         | POS        | Fold-change <sup>a</sup> | T-test <sup>a</sup> | Fold-change <sup>b</sup> | T-test <sup>b</sup> |
|--------------------------------------------|------------|------------|------------|------------|--------------------------|---------------------|--------------------------|---------------------|
| LysoPC(O-18:0)                             | 1.37±0.13  | 0.93±0.08  | 1.07±0.12  | 1.15±0.15  | -0.32                    | 0.01                | 0.16                     | 0.33                |
| LysoPC(20:4(5Z,8Z,11Z,14Z))                | 2.33±0.12  | 1.96±0.09  | 2.21±0.12  | 2.25±0.14  | -0.16                    | 0.02                | 0.13                     | 0.11                |
| LysoPE(0:0/22:2(13Z,16Z))                  | 0.84±0.11  | 0.54±0.04  | 0.63±0.03  | 0.70±0.07  | -0.36                    | 0.02                | 0.15                     | 0.14                |
| PE(22:1(13Z)/14:0)                         | 1.31±0.09  | 1.60±0.07  | 0.11±0.01  | 0.14±0.01  | 0.22                     | 0.02                | -0.93                    | 0.00                |
| PG(18:3(6Z,9Z,12Z)/18:3(6Z,9Z,12Z))        | 3.01±0.21  | 3.75±0.17  | 0.24±0.03  | 0.27±0.01  | 0.25                     | 0.02                | -0.94                    | 0.00                |
| PS(15:0/20:5(5Z,8Z,11Z,14Z,17Z))           | 1.33±0.09  | 1.65±0.08  | 0.12±0.01  | 0.14±0.01  | 0.24                     | 0.02                | -0.92                    | 0.00                |
| LysoPC(17:0)                               | 0.32±0.06  | 0.63±0.10  | 0.24±0.03  | 0.21±0.04  | 0.99                     | 0.02                | -0.62                    | 0.00                |
| LysoPC(20:4(5Z,8Z,11Z,14Z))                | 1.20±0.08  | 0.98±0.04  | 1.16±0.08  | 1.10±0.08  | -0.18                    | 0.02                | 0.18                     | 0.06                |
| PC(18:3(9Z,12Z,15Z)/16:0)                  | 15.29±0.67 | 12.62±0.99 | 14.11±0.74 | 10.30±0.61 | -0.17                    | 0.05                | 0.12                     | 0.25                |
| PA(18:0/22:2(13Z,16Z))                     | 2.51±0.10  | 1.99±0.08  | 2.33±0.12  | 1.65±0.04  | -0.20                    | 0.00                | 0.17                     | 0.04                |
| PC(16:0/18:1(11E))                         | 12.06±0.38 | 10.33±0.31 | 11.26±0.42 | 10.71±0.43 | -0.14                    | 0.00                | 0.09                     | 0.10                |
| PA(18:0/22:0)[U]                           | 4.03±0.16  | 3.44±0.16  | 3.89±0.17  | 3.76±0.19  | -0.14                    | 0.02                | 0.13                     | 0.08                |
| PC(14:0/20:0)                              | 1.03±0.04  | 0.87±0.05  | 1.02±0.04  | 0.98±0.05  | -0.15                    | 0.03                | 0.16                     | 0.05                |
| L-Tryptophan                               | 5.33±0.36  | 6.49±0.21  | 5.86±0.24  | 4.86±0.38  | 0.22                     | 0.01                | -0.10                    | 0.07                |
| L-Asparagine                               | 1.62±0.08  | 2.09±0.09  | 1.68±0.11  | 2.47±0.18  | 0.29                     | 0.00                | -0.19                    | 0.01                |
| L-Arginine                                 | 0.67±0.06  | 0.97±0.06  | 0.72±0.15  | 0.66±0.05  | 0.44                     | 0.00                | -0.26                    | 0.14                |
| L-Histidine                                | 5.35±0.85  | 8.01±0.26  | 6.65±0.14  | 8.36±0.39  | 0.50                     | 0.01                | -0.17                    | 0.00                |
| PG(16:0/22:4(7Z,10Z,13Z,16Z))              | 0.47±0.05  | 1.01±0.18  | 0.82±0.12  | 0.67±0.04  | 1.15                     | 0.02                | -0.19                    | 0.40                |
| Adenine                                    | 1.17±0.14  | 1.74±0.15  | 1.25±0.18  | 1.20±0.14  | 0.49                     | 0.01                | -0.28                    | 0.05                |
| Asparaginy-Histidine/Histidinyl-Asparagine | 20.79±4.70 | 43.85±1.76 | 28.54±2.58 | 39.88±2.66 | 1.11                     | 0.00                | -0.35                    | 0.00                |
| Maltotriose                                | 29.35±1.22 | 18.50±4.27 | 22.84±3.05 | 13.20±3.01 | -0.37                    | 0.04                | 0.23                     | 0.42                |
| PG(18:3(9Z,12Z,15Z)/13:0)                  | 0.15±0.06  | 0.63±0.10  | 0.38±0.08  | 0.78±0.10  | 3.15                     | 0.00                | -0.40                    | 0.06                |
| PS(18:2(9Z,12Z)/12:0)                      | 18.53±2.23 | 6.79±1.74  | 12.16±2.36 | 5.18±2.20  | -0.63                    | 0.00                | 0.79                     | 0.09                |
| PG(12:0/15:0)                              | 0.74±0.19  | 0.06±0.03  | 0.20±0.07  | 0.08±0.06  | -0.92                    | 0.00                | 2.48                     | 0.08                |
| PI(13:0/18:3(6Z,9Z,12Z))                   | 4.12±0.36  | 5.99±0.30  | 5.23±0.29  | 5.87±1.25  | 0.46                     | 0.00                | -0.13                    | 0.09                |
| Glycocholic acid                           | 1.86±0.16  | 2.68±0.13  | 2.35±0.13  | 2.63±0.56  | 0.44                     | 0.00                | -0.12                    | 0.10                |
| Taurodeoxycholic acid                      | 0.81±0.07  | 1.17±0.06  | 1.02±0.06  | 1.15±0.25  | 0.45                     | 0.00                | -0.13                    | 0.09                |
| PA(P-20:0/22:2(13Z,16Z))                   | 1.58±0.24  | 2.65±0.13  | 2.28±0.20  | 1.35±0.11  | 0.68                     | 0.00                | -0.14                    | 0.14                |
| PS(20:5(5Z,8Z,11Z,14Z,17Z)/18:1(9Z))       | 1.92±0.19  | 2.90±0.13  | 2.58±0.09  | 1.79±0.13  | 0.51                     | 0.00                | -0.11                    | 0.07                |
| 4-Hydroxybenzenesulfonic acid              | 0.76±0.07  | 1.11±0.04  | 1.03±0.03  | 0.71±0.04  | 0.46                     | 0.00                | -0.08                    | 0.15                |
| Acetylcarnitine                            | 1.84±0.12  | 1.39±0.06  | 1.73±0.07  | 1.47±0.08  | -0.25                    | 0.00                | 0.25                     | 0.00                |
| PS(18:1(9Z)/20:5(5Z,8Z,11Z,14Z,17Z))       | 0.69±0.03  | 1.04±0.06  | 0.95±0.06  | 1.06±0.04  | 0.51                     | 0.00                | -0.09                    | 0.29                |
| PS(18:0/18:4(6Z,9Z,12Z,15Z))               | 6.98±0.86  | 1.59±0.37  | 2.06±0.39  | 2.03±0.24  | -0.77                    | 0.00                | 0.29                     | 0.40                |
| PS(21:0/0:0)                               | 0.81±0.08  | 1.59±0.24  | 1.35±0.10  | 2.11±0.17  | 0.95                     | 0.01                | -0.15                    | 0.37                |

Intensity of metabolite is expressed as mean ± SEM (n=8/group).

Superscript: a, Fold-change and T-test value is calculated after comparison between DSS group and CON group; b, Fold-change and T-test value is calculated after comparison between HF group and DSS group.

Table S3.

Scoring system to calculate the disease activity index (DAI)<sup>a</sup>

| <b>Score</b> | <b>Weight loss</b> | <b>Stool consistency</b> | <b>Visible blood in feces</b> |
|--------------|--------------------|--------------------------|-------------------------------|
| 0            | None               | normal                   | none                          |
| 1            | 1-5%               |                          |                               |
| 2            | 6-10%              | loose                    | Slight bleeding               |
| 3            | 11-15%             |                          |                               |
| 4            | >15%               | diarrhea                 | Gross bleeding                |

<sup>a</sup>DAI value is calculated as the sum of the scores for weight loss, stool consistency and blood in feces.

Table S4.

Histological scoring system for DSS-induced colitis<sup>a</sup>

| <b>Feature</b>           | <b>Score</b> | <b>Description</b>                     |
|--------------------------|--------------|----------------------------------------|
| Severity of inflammation | 0            | none                                   |
|                          | 1            | mild                                   |
|                          | 2            | moderate                               |
|                          | 3            | severe                                 |
| Extent of inflammation   | 0            | none                                   |
|                          | 1            | mucosa                                 |
|                          | 2            | Mucosa and submucosa                   |
|                          | 3            | transmural                             |
| Crypt damage             | 0            | none                                   |
|                          | 1            | 1/3 damaged                            |
|                          | 2            | 2/3 damaged                            |
|                          | 3            | Crypt lost, surface epithelium present |
|                          | 4            | Crypt lost, surface epithelium lost    |

<sup>a</sup>Scores were calculated by adding the score for the three parameters giving a maximum score of 10.

Table S5.

## Primer sequences for RT-PCR

| <b>Protein (Mus)</b>             | <b>Gene</b>  | <b>Sequence, forward/reverse</b>                           |
|----------------------------------|--------------|------------------------------------------------------------|
| Hypoxia-inducible factor 1-alpha | HIF1A(MOUSE) | 5' TGGAAGGTATGTGGCATTATTGG 3'<br>5' ACCAACAGGGTGGGCAGAAC3' |
| Tumor necrosis factor-alpha      | TNFA(MOUSE)  | 5' GTCCCAAAGGGATGAGAAGT 3'<br>5' TTTGCTACGACGTGGGCTAC 3'   |
| $\beta$ -Actin                   | ACTB         | 5' CTGTCGAGTCGCGTCCACCC 3'                                 |
| □                                | □            | 5' GCTTTGCACATGCCGGAGCC 3'                                 |

Figure S1.

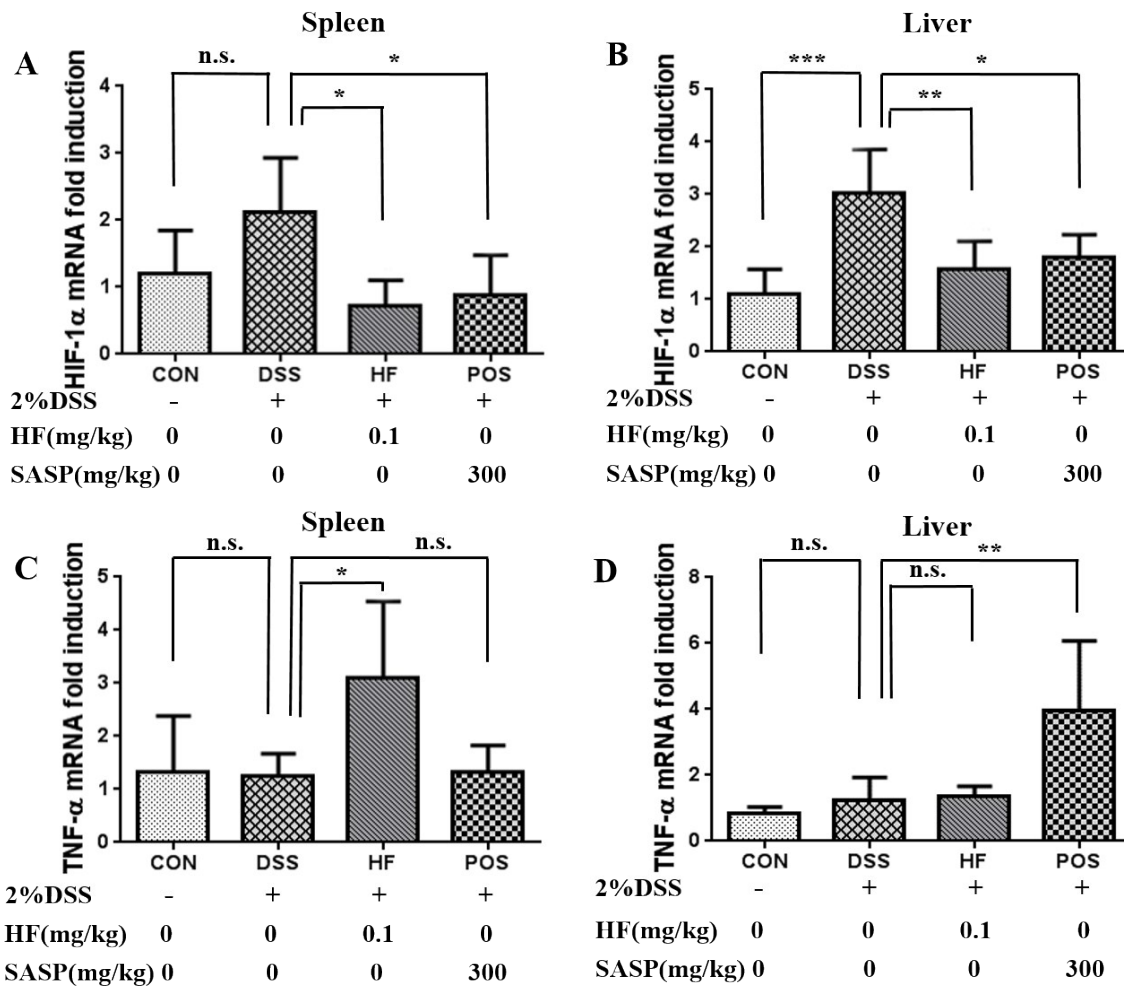

Figure S2.

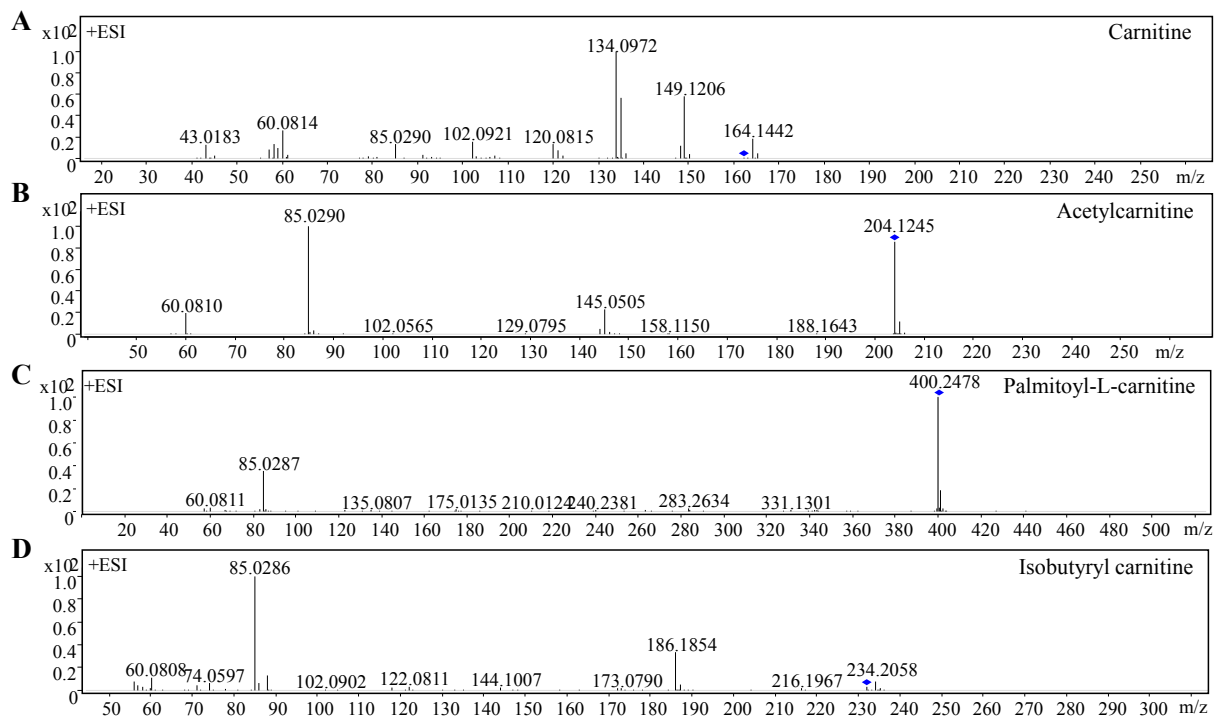



Figure S3.

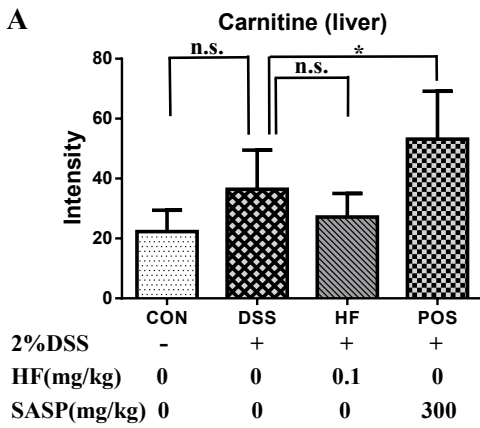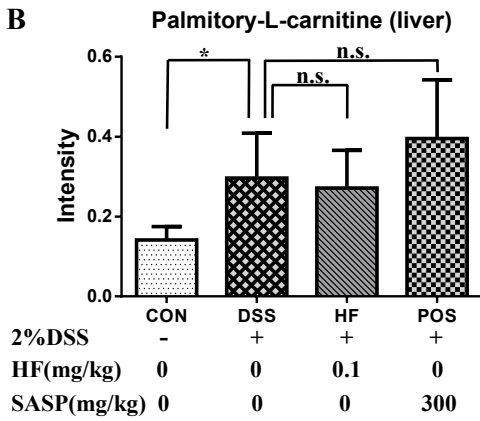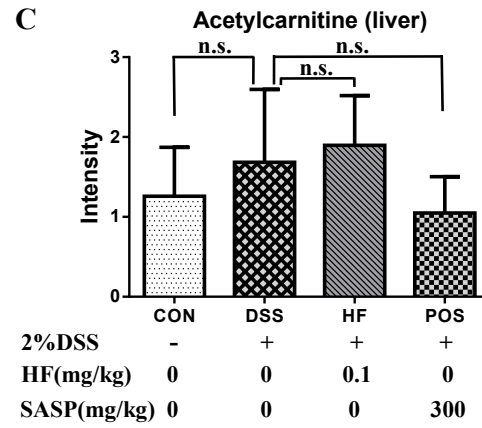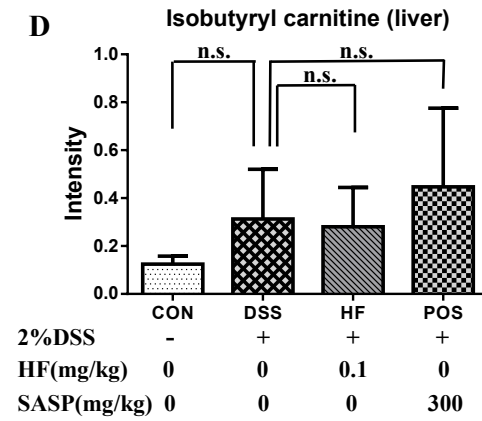

Figure S4.

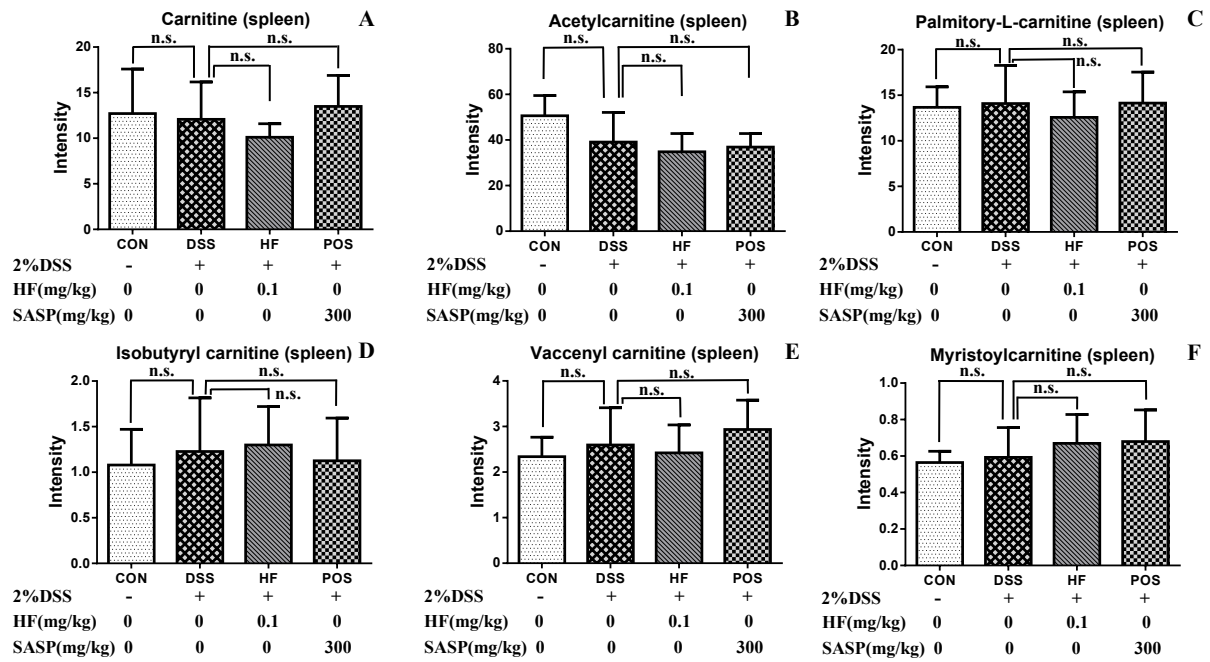

Supplement: c6mb00154h1.pdf [file c6mb00154h1.pdf]
